# Supplementary material
Source: Royal Society of Chemistry journal article supplement (doi:10.1039/d6ta00807k)
Supplement: d6ta00807k1.pdf [file d6ta00807k1.pdf]

## Supporting Information

### Self-Powered Hazard Warning Alarm System based on CNT/Cellulose Aerogel TENG for Firefighter Protection.

**Table S1. Comparison of state-of-the-art aerogel-based triboelectric nanogenerators (TENGs) and protective materials.**

| Reference                                           | Material system                          | $V_{OC}(V)$ | $I_{SC}(\mu A)$ | Thermal Conductivity, $\lambda$ (W/(m·K)) | Notes                     | Ref. |
|-----------------------------------------------------|------------------------------------------|-------------|-----------------|-------------------------------------------|---------------------------|------|
| Li et al.,<br>2024, AFM                             | silica/ANF<br>aerogel fibers             | 15.8        | 0.18            | 0.033                                     | PCWA-<br>TENG             | [49] |
| Sun et al.,<br>2024,<br>AFM                         | MXene-Based<br>Composite<br>aerogels     | 10          | 1.6             | 0.022                                     | MPS-UHP -<br>TENG         | [46] |
| Wang et al.,<br>2024,<br>Small                      | CNFs/PMSQ<br>aerogels                    | 80          | 1.2             | 17                                        | LTC-S3-<br>TENG           | [50] |
| Hu et al.,<br>2025, CEJ                             | ZIF-67/Zylon<br>aerogel fabric           | 70.8        | 2.0             | 0.042                                     | ZIF-<br>67/Zylon-<br>TENG | [47] |
| Jalali et al.,<br>2025,<br>Carbohydrate<br>Polymers | 3D-printed<br>chitosan/MXene<br>aerogels | 110         | 1.9             | 0.025                                     | 3D-printed<br>TENG        | [48] |
| This work                                           | CCHA aerogels                            | 210         | 30              | 0.0077                                    | CCHA-TENG                 |      |

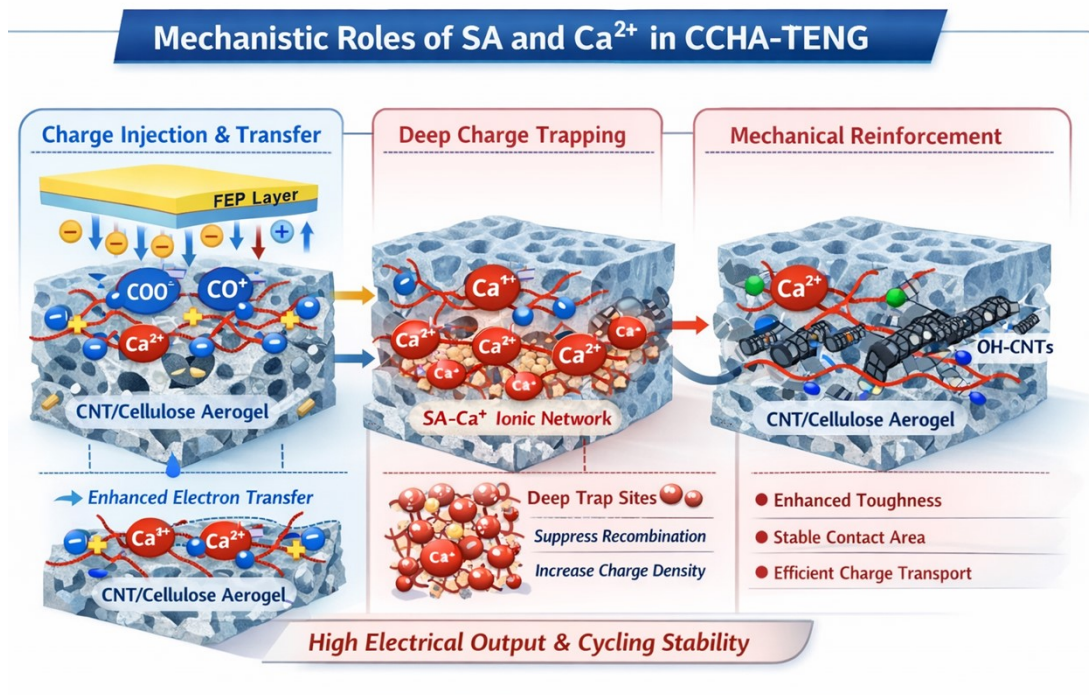

**Fig. S2 Schematic illustration of the multifunctional roles of the SA-Ca<sup>2+</sup> ionic crosslinking network in the CCHA-TENG.**

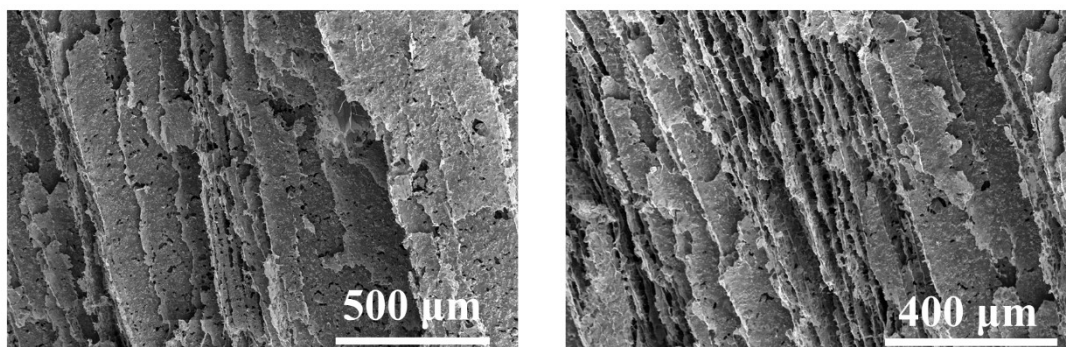

**Fig. S3 Cross-sectional SEM images of the S1 CCHA aerogel**

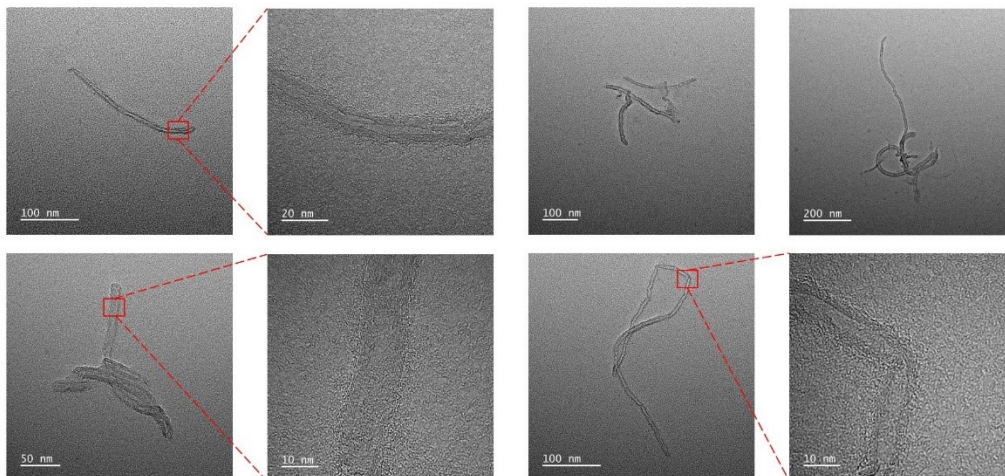

**Fig. S4 TEM images showing the dispersion of CNTs within the CCHA composite aerogel matrix.**

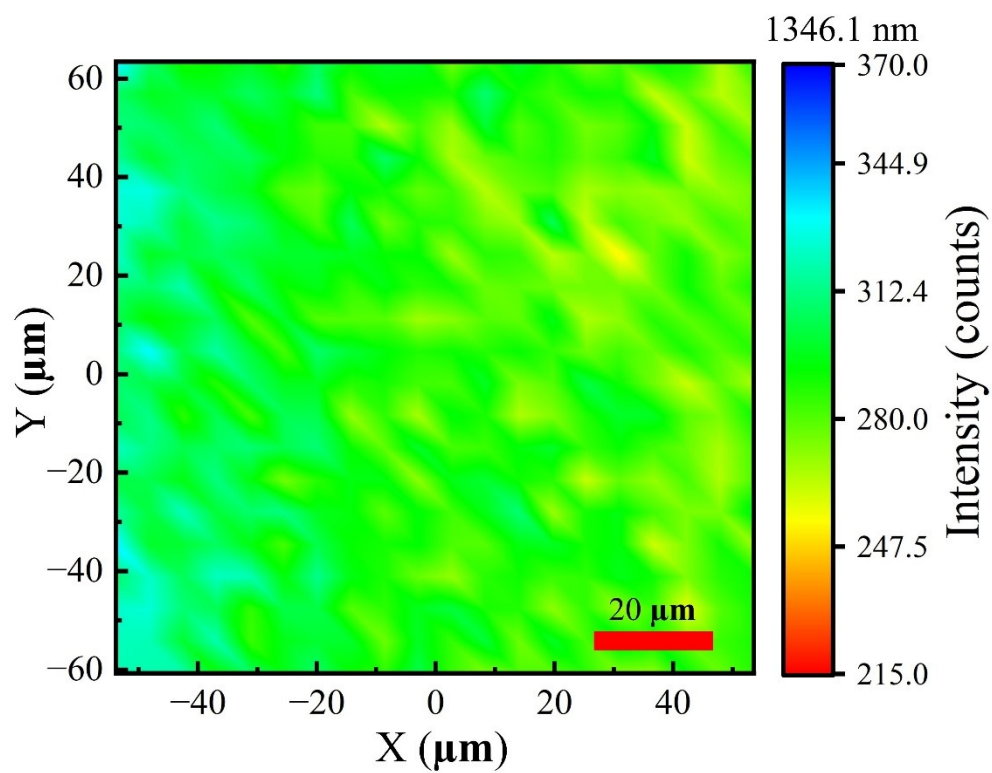

**Fig. S5 Raman mapping of the D band ( $\sim 1346 \text{ cm}^{-1}$ ) collected over a  $60 \times 60 \mu\text{m}^2$  region of the CCHA composite aerogel.**

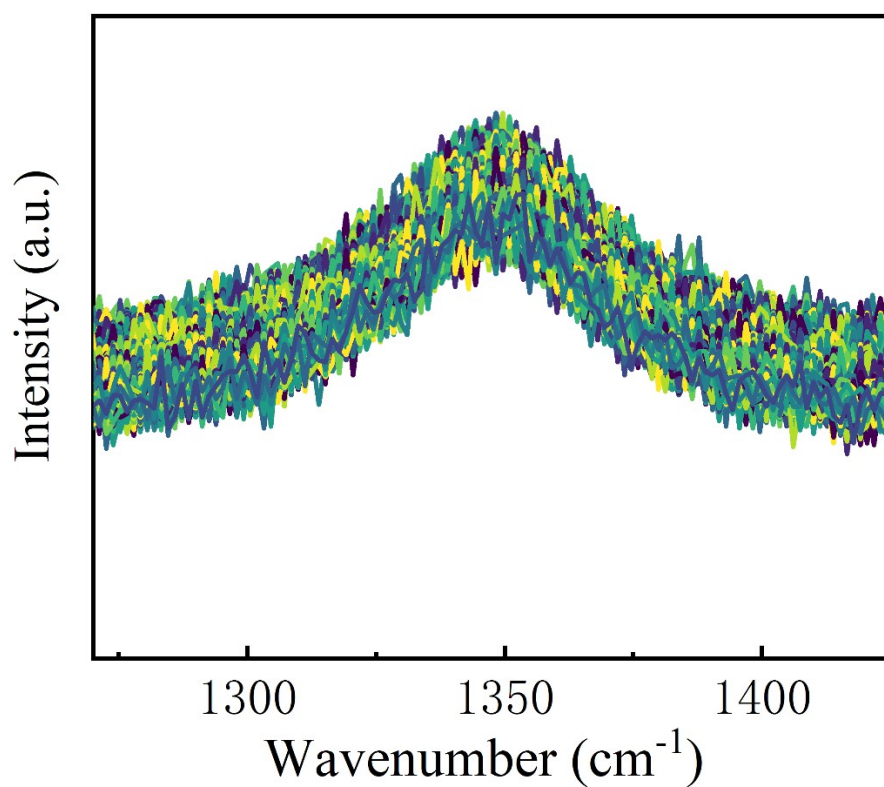

**Fig. S6** Raman spectra obtained from different mapping points within the Raman mapping area of the CCHA composite aerogel.

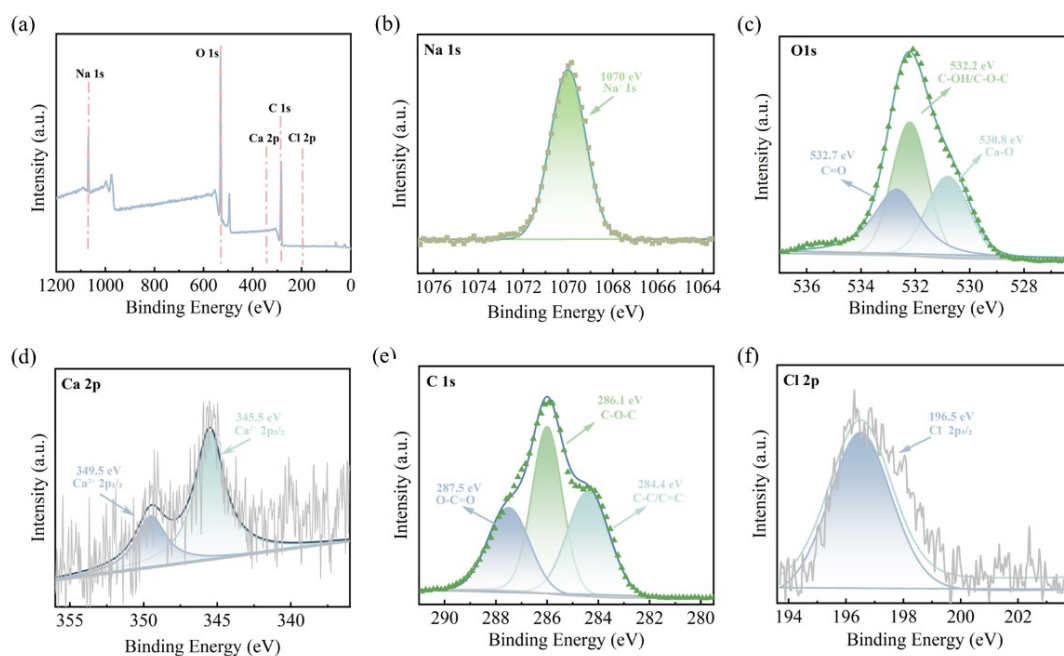

**Fig. S7** X-ray photoelectron spectroscopy (XPS) analysis of the composite aerogel: (a) survey spectrum, (b) Na 1s, (c) O 1s, (d) Ca 2p, (e) C 1s, and (f) Cl 2p.

**Table S8.** The pore parameters of CCHA were measured by mercury intrusion.

| Samples | Porosity | Average aperture | Median aperture V | Median aperture A | Total pore volume | Total pore area (m <sup>2</sup> /g) |
|---------|----------|------------------|-------------------|-------------------|-------------------|-------------------------------------|
|         |          | 4 V/A (nm)       | (nm)              | (nm)              | (mL/g)            |                                     |
| CCHA    | 93.41    | 1337.93          | 17462.76          | 37.19             | 10.95             | 32.73                               |

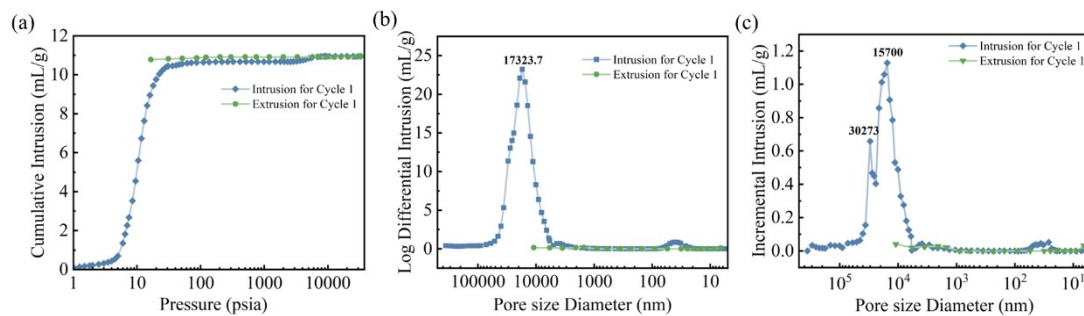

**Fig. S9** Mercury intrusion porosimetry (MIP) analysis of the CCHA aerogel: (a) Cumulative intrusion volume as a function of pressure. (b) Log-differential intrusion curve as a function of pore size diameter. (c) Differential pore size distribution of the CCHA aerogel.

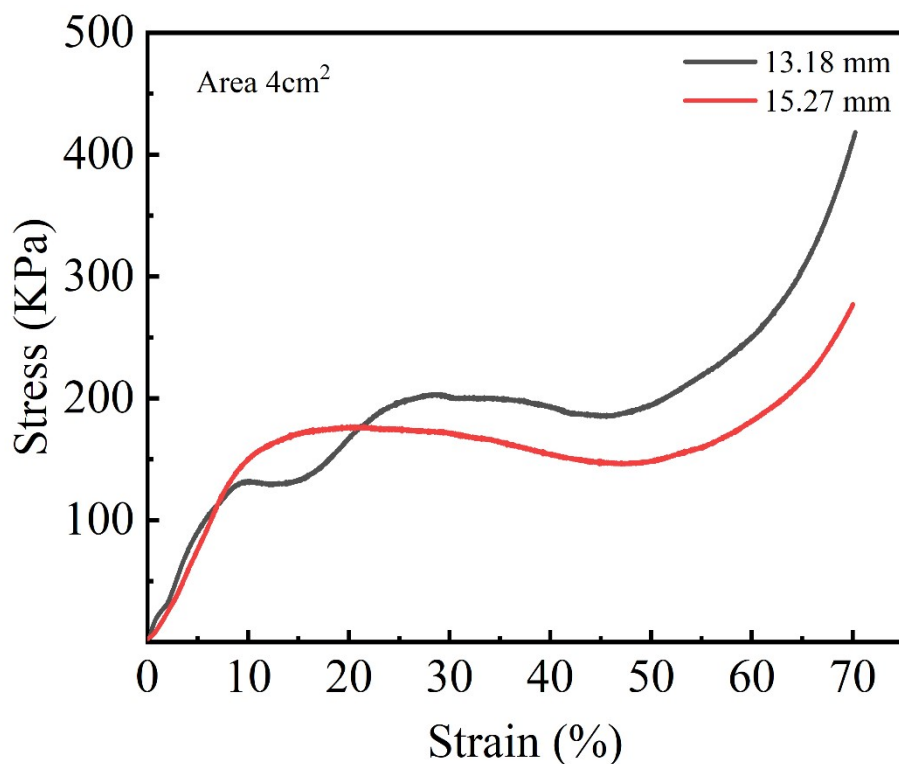

**Fig. S10** Uniaxial compressive stress–strain curves of CCHA aerogels with identical cross-sectional areas (4 cm<sup>2</sup>) but different initial heights (13.18 mm and 15.27 mm).

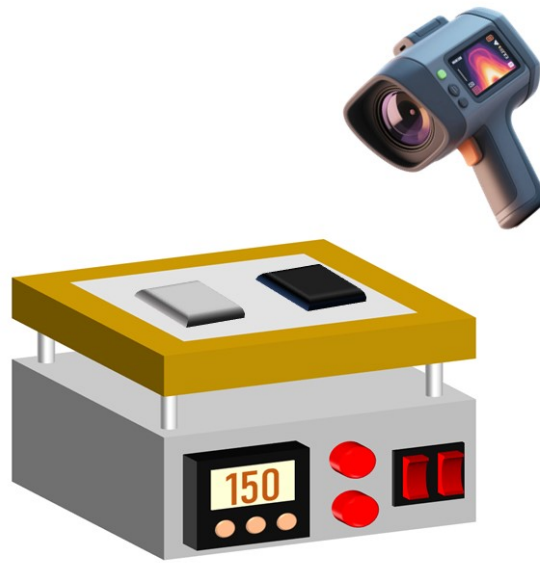

**Fig. S11 Schematic Diagram of the Working Principle of Thermal Imaging.**

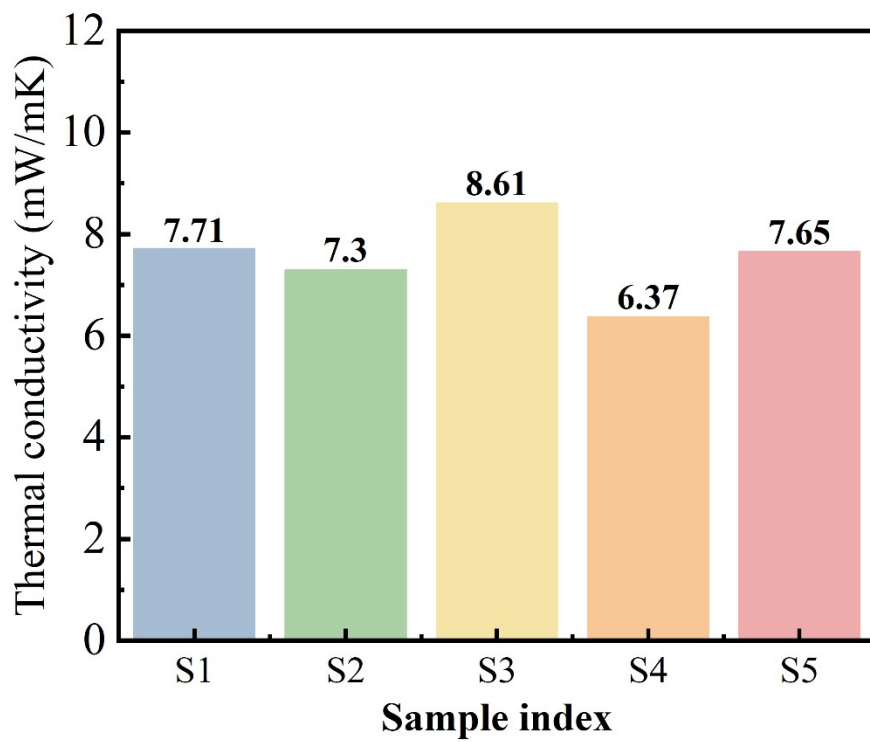

**Fig. S12 Reproducibility test of radial thermal conductivity of CCHA aerogels.**

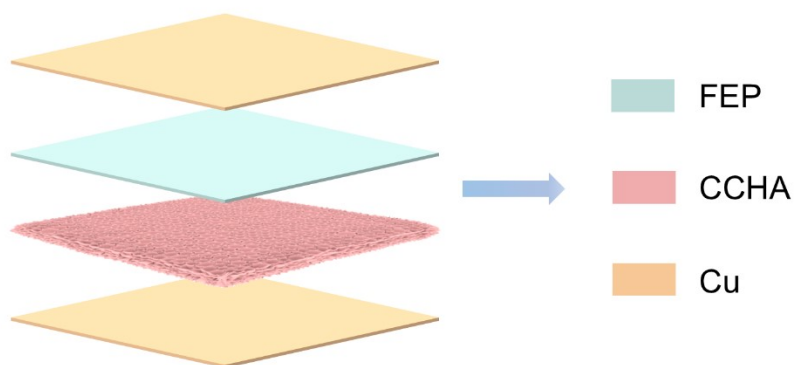

**Fig. S13 Structure of CCHA-TENG.**

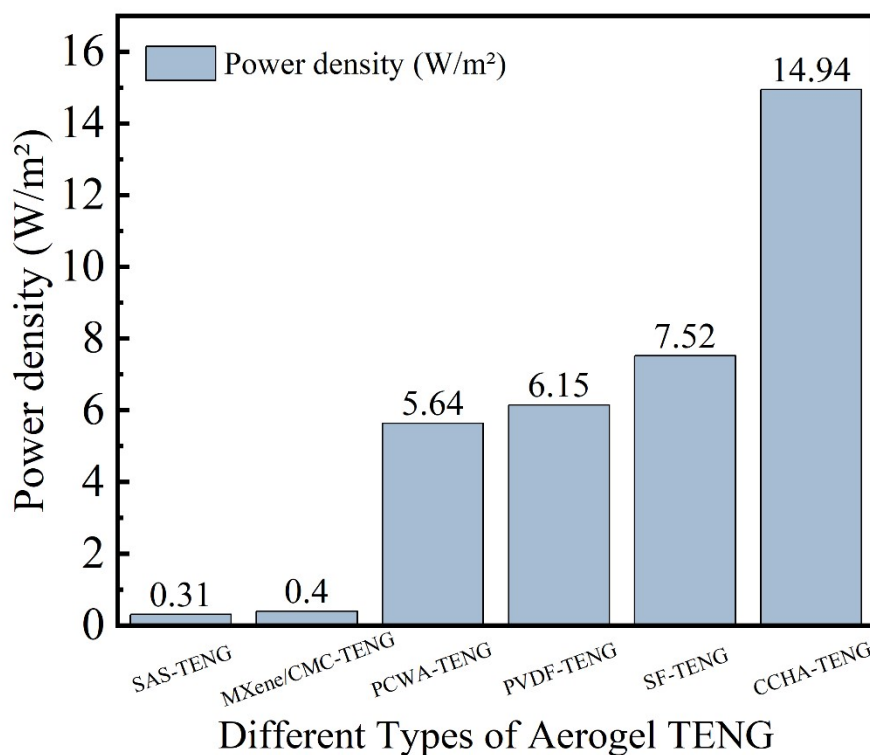

**Fig. S14 Comparison of the reported power densities of representative aerogel-based TENGs. The maximum power density in each case was calculated at the optimal load resistance. Differences in testing conditions may exist; therefore, this comparison serves as qualitative benchmarking rather than a strict quantitative evaluation.**

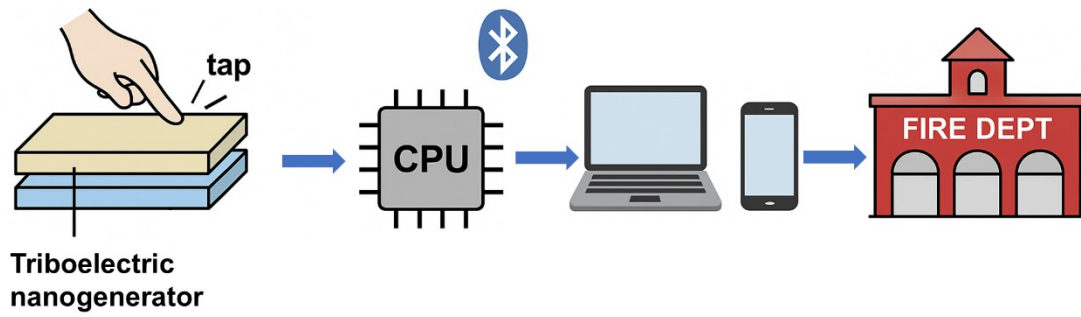

**Fig. S15 Operating modes of CCHA-TENG wireless transmission.**

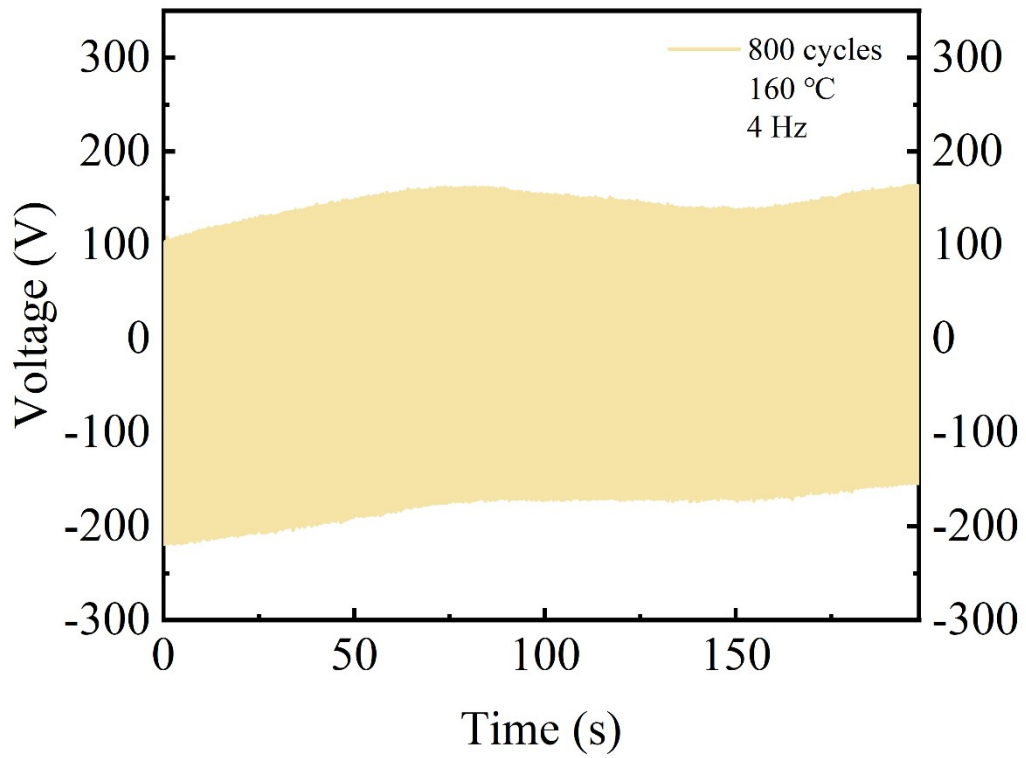

**Fig. S16 Cyclic durability of the CCHA-TENG after thermal treatment at 160 °C.**
